# Supplementary material for: Hydrothermally activated TiO2 nanoparticles with a C-dot/g-C3N4 heterostructure for photocatalytic enhancement
Source: Royal Society of Chemistry journal article supplement (doi:10.1039/d1na00213a), 2021-01-01
Supplement: d1na00213a1.pdf [file d1na00213a1.pdf]

## ***Supplementary Information***

### **Hydrothermally Activated TiO<sub>2</sub> Nanoparticles with C-dots/g-C<sub>3</sub>N<sub>4</sub> Heterostructure for Photocatalytic Enhancement**

Zhong-yi Chen,<sup>a</sup> Tian-hao Ji,<sup>\*a</sup> Zhe-mi Xu,<sup>a</sup> Peiyuan Guan,<sup>b</sup> Da-jian Jv<sup>a</sup>

<sup>a</sup> *Chemistry and Material Engineering College, Beijing Technology and Business University, Beijing 100048, China*

<sup>b</sup> *School of Materials Science and Engineering, University of New South Wales, Sydney 2052, Australia*

\*Corresponding author: [jitianhao@th.btbu.edu.cn](mailto:jitianhao@th.btbu.edu.cn)

#### **Preparation of raw materials**

##### **(1) C-dots and g-C<sub>3</sub>N<sub>4</sub>**

C-dots were synthesized by modifying the method from our previous report [1]. Typically, 20 g of citric acid monohydrate was dissolved into a Teflon tank containing 7 mL of D.I. water, then 6 mL of ethylenediamine was slowly added with stirring till the suspension become viscous. The Teflon tank was transferred to an autoclave and heated at 180 °C for 20 h. After cooling down to room temperature naturally, the mixture was firstly poured into a beaker containing 200 mL absolute ethanol and waited for sedimentation of 1 day. The C-dots were obtained after centrifugally washing by D.I and vacuum drying under 80 °C for 24 h. g-C<sub>3</sub>N<sub>4</sub> was simply prepared by heating melamine in air at 550 °C for 5 h in a Muffle furnace.

##### **(2) C-dots/g-C<sub>3</sub>N<sub>4</sub> composite**

The CC composite was prepared through a hydrothermal impregnation process. 0.3 g of C-dots was mixed with 1 g of g-C<sub>3</sub>N<sub>4</sub> by grinding in an agate mortar for 30 min, and then the mixed powder was added into a Teflon-lined autoclave containing 20 mL of D.I. water with vigorous stirring. The mixture was hydrothermally treated at 180 °C for 20 h, followed by naturally cooled down to room temperature. Finally, the product CC was obtained under vacuum drying after centrifugally washing by water and ethanol several times.

### Measurement results

#### (1) TEM images of C-dots and g-C<sub>3</sub>N<sub>4</sub>

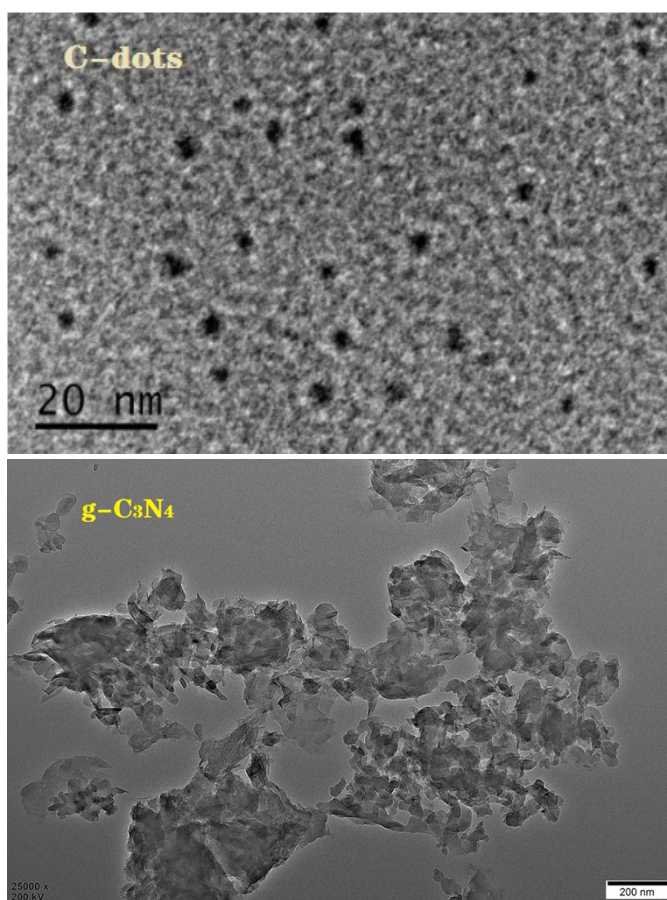

**S-Fig. 1.** TEM images of C-dots and g-C<sub>3</sub>N<sub>4</sub>.

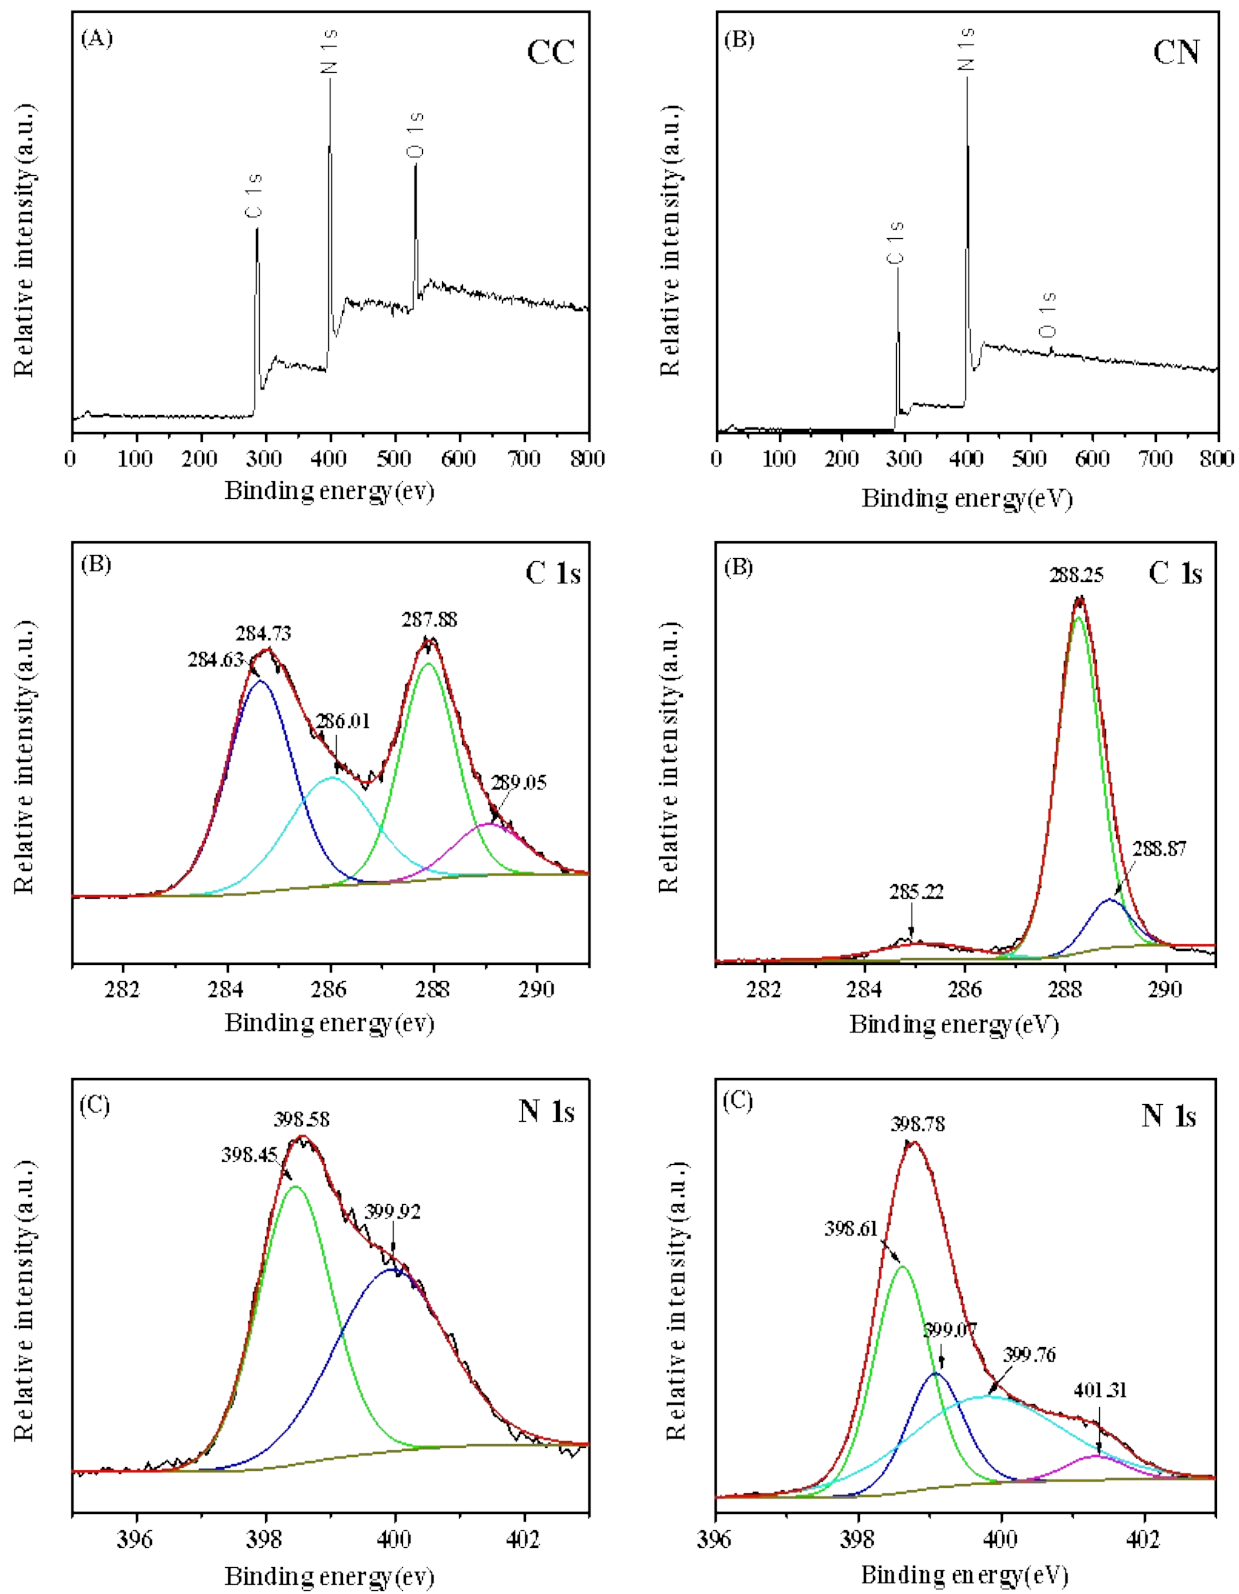

**S-Fig. 2.** XPS measurement results of CC (A-C) and g-C<sub>3</sub>N<sub>4</sub> (D-F).

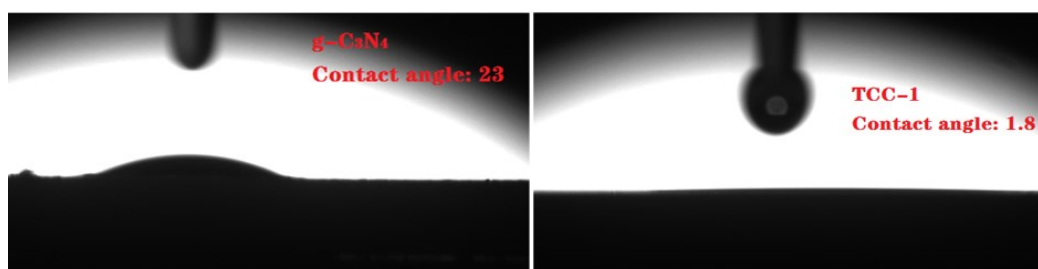

**S-Fig. 3.** Contact angle measurements of water drop on the surface of the thin films of g-C<sub>3</sub>N<sub>4</sub> and TCC-1.

S-Fig. 4 shows PL spectra of RhB in aqueous solution with original concentration of  $1.0 \times 10^{-5}$  M after photocatalytic degradation of 10.0 mg TCC-1 powder under different light-irradiation time, using 15 W mercury-light partly with the wavelength of 365 nm. It should be stressed that after photocatalyzed for 80 min, the PL intensity has become about one seventh of that of original Rh B solution, inferring that to common organic dyes, the TCC-1 should display excellent photodegradation property.

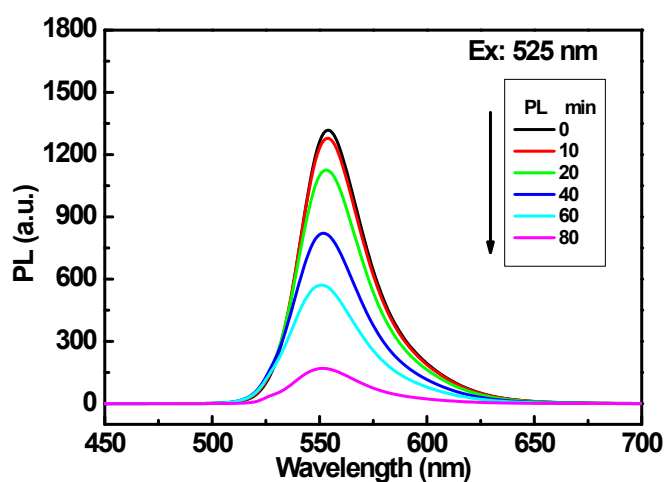

**S-Fig. 4.** PL spectra of RhB aqueous solution under different light-irradiation period after photocatalysis of TCC-1.

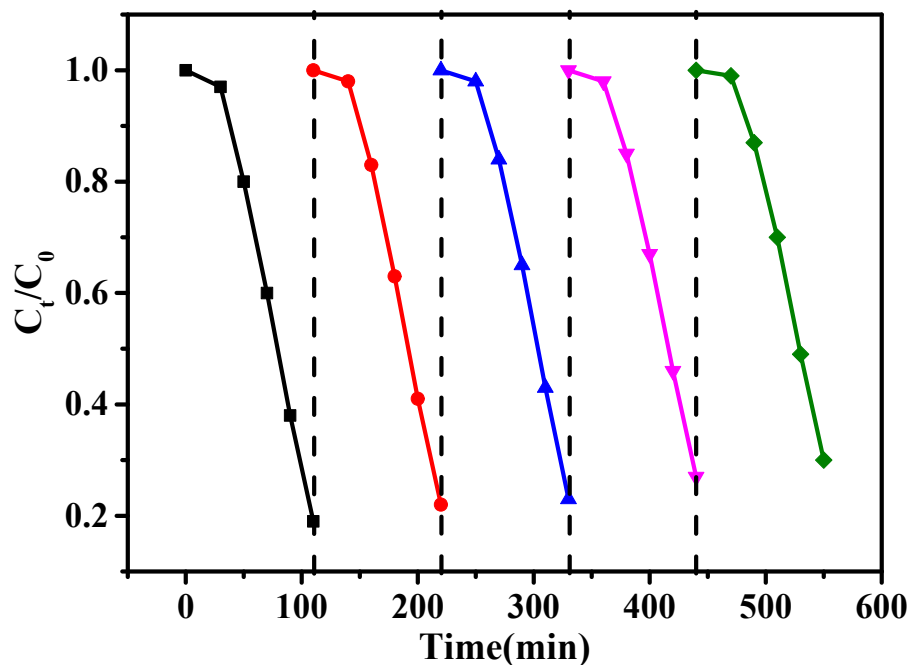

**S-Fig. 5.** Repeated photocatalytic photodegradation of RhB by TCC-1 for the stability confirmation.

**S-Table. 1.** A comparison of recent reported TiO<sub>2</sub> and g-C<sub>3</sub>N<sub>4</sub>-based photocatalysts.

|   | Photocatalyst                                                                     | Degradation materials | Degradation rate        | k value                   | Active species               | References |
|---|-----------------------------------------------------------------------------------|-----------------------|-------------------------|---------------------------|------------------------------|------------|
| 1 | TiO <sub>2</sub> /carbon quantum dots/ mesoporous g-C <sub>3</sub> N <sub>4</sub> | Gaseous benzene       | 96.08% after 120 mins   | 0.02726 min <sup>-1</sup> | •O <sup>2-</sup>             | [2]        |
| 2 | TiO <sub>2</sub> /single layer g-C <sub>3</sub> N <sub>4</sub>                    | RhB                   | 95% after 150 mins      | 0.0107 min <sup>-1</sup>  | h <sup>+</sup>               | [3]        |
| 3 | TiO <sub>2</sub> nanowire /g-C <sub>3</sub> N <sub>4</sub> /graphene              | Nitrobenzene          | 97% after 4 hours       | -                         | e <sup>-</sup>               | [4]        |
| 4 | C-dots/g-C <sub>3</sub> N <sub>4</sub>                                            | RhB                   | About 80% after 70 mins | 0.013 min <sup>-1</sup>   | •O <sub>2</sub> <sup>-</sup> | [5]        |
| 5 | TiO <sub>2</sub> /C-dots/g-C <sub>3</sub> N <sub>4</sub>                          | RhB & MB              | 83.3% after 80 mins     | 0.0233 min <sup>-1</sup>  | h <sup>+</sup>               | This work  |

## Reference

1. Ji, T.-H., X.-L. Li, Y. Mao, Z. Mei, and Y. Tian; Electron/energy co-transfer behavior and reducibility of Cu-chlorophyllin-bonded carbon-dots. *RSC Advances*, **2020**, *10*, 31495-31501.
2. Zhao, C., H. Jia, W. Jin, F. Li, H. Li, and W. Chen; TiO<sub>2</sub> nanoparticles and CQDs co-decorated mesoporous g-C<sub>3</sub>N<sub>4</sub> and their photocatalytic properties for gaseous benzene degradation. **2019**, *12*, 1950086.
3. Lu, N., C. Wang, B. Sun, Z. Gao, and Y. Su; Fabrication of TiO<sub>2</sub>-doped single layer graphitic-C<sub>3</sub>N<sub>4</sub> and its visible-light photocatalytic activity. *Separation and Purification Technology*, **2017**, *186*, 226-232.
4. Zhang, L., X. He, X. Xu, C. Liu, Y. Duan, L. Hou, Q. Zhou, C. Ma, X. Yang, R. Liu, F. Yang, L. Cui, C. Xu, and Y. Li; Highly active TiO<sub>2</sub>/g-C<sub>3</sub>N<sub>4</sub>/G photocatalyst with extended spectral response towards selective reduction of nitrobenzene. *Applied Catalysis B: Environmental*, **2017**, *203*, 1-8.
5. Fang, S., Y. Xia, K. Lv, Q. Li, J. Sun, and M. Li; Effect of carbon-dots modification on the structure and photocatalytic activity of g-C<sub>3</sub>N<sub>4</sub>. *Applied Catalysis B: Environmental*, **2016**, *185*, 225-232.
